# Supplementary material
Source: Research Square preprint supplement (doi:10.21203/rs.3.rs-9420697/v1)
Supplement: Supplementary file 1 [file 01d37442f22121b26eccc406.docx]

**Ethics Approval and Informed Consent**

The research involved secondary data analysis of the anonymized databases; therefore, patient consent and the approval of an ethics committee were not needed.
