# Supplementary material
Source: Research Square preprint supplement (doi:10.21203/rs.3.rs-9420697/v1)
Supplement: Supplementary file 2 [file 02d350a24891cb68727d3a90.docx]

**Declaration of competing interest**

Corresponding authors, on behalf of all the authors of a submission, disclose no conflict of interest regarding this research article.
