# Supplementary material
Source: Research Square preprint supplement (doi:10.21203/rs.3.rs-9420697/v1)
Supplement: Supplementary file 3 [file 90191e65532da11726262866.docx]

CRediT author statement

**Khin Zay Yar Myint (ORCID: 0000-0001-5553-1245):** Conceptualization, Methodology, Formal analysis, Data curation, Visualization, Writing- Original draft preparation.　 **Ikumi Genka**: Investigation, Resources, Project administration, Writing- Reviewing and Editing. **Masamori Shimabuku**: Investigation, Resources, Project administration. ***Sayuri Suyama****:* Investigation. **Ichiro Akagi**: Investigation. **Toshiomi Kusano***:* Resources, Supervision, Writing- Reviewing and Editing**. Junichi Taguchi:** Resources, Supervision, Writing- Reviewing and Editing.
